# Supplementary material
Source: Research Square preprint supplement (doi:10.21203/rs.3.rs-9507777/v1)
Supplement: Supplementary file 1 [file 39e71fc2bf3a890917d0d758.xlsx]

## Sheet: Sheet1
First author (year)	Sex	Age	MRC at admission	Onset to intubation	Onset to brain death-like state	Ventilation duration	Autonomic dysfunction	Electrophysiology	EEG	Outcome	Treatment
Libonati (2021)[6]	M	61	18	1 day	1 day	55 days	Yes	No sensory-motor responses	Reactive alpha activity	Quadriplegia persisted at 5 months	IVIG + plasma exchange
Ravikumar (2016)[7]	M	60	54	3 days	5 days	NR	Yes	No limb motor responses	Reactive alpha activity	Wheelchair dependent at 6 months	IVIG + plasma exchange
Martí-Massó (1993)[8]	F	58	48	12 h	24 h	15 days	Yes	Axonal injury	Non-reactive alpha activity	Independent walking at 5 months	Plasma exchange
Moody (2013)[9]	M	53	NR	4 h	2 days	32 days	Yes	No sensory-motor responses	Alpha coma	Severe residual leg weakness at 28 months	IVIG
Ragazzoni (2000)[10]	M	40	NR	1 day	2 days	NR	Yes	No sensory-motor responses	Reactive alpha activity	Recovered motor function by 2 years	Plasma exchange
Ragazzoni (2000)[10]	M	46	NR	3 days	4 days	NR	Yes	No sensory-motor responses	Reactive alpha activity	Died of cardiac arrest on day 66	Plasma exchange
Coomes (2018)[11]	M	45	18	10 days	30 days	Months	NR	Reduced sensory-motor amplitudes	Non-reactive alpha activity	Strength recovered after months	IVIG + plasma exchange + steroids + mycophenolate
Vargas (2000)[12]	F	45	0	1 day	1 day	60 days	Yes	No sensory-motor responses	Reactive alpha activity	Upper limbs 3/5, lower limbs 2/5 at 8 months	Plasma exchange
Kang (2007)[13]	M	32	NR	3 days	4 days	30 days	Yes	No motor responses	Reactive alpha activity	Limb strength recovered at 3 months	IVIG + steroid pulse
Rivas (2008)[14]	M	55	NR	Postoperative intubation	7 days	150 days	NR	No sensory-motor responses	Non-reactive alpha activity	Able to stand at 5 months	Plasma exchange
Liik (2012)[15]	F	44	NR	1 day	2 days	16 days	NR	No sensory-motor responses	Theta background	Walking with assistance at 29 months	IVIG
James (2024)[16]	F	66	42	2 days	5 days	NR	Yes	NR	Normal	Pupillary reflex recovered after 1 week	IVIG
Coad (1990)[17]	M	43	NR	4 days	4 days	105 days	Yes	NR	Non-reactive background	Spontaneous breathing at 15 weeks	NR
Rigamonti (2009)[18]	F	61	54	14 days	14 days	90 days	NR	No sensory-motor responses	Reactive alpha activity	Walking with a cane at 1 year	IVIG
Bernard (2010)[19]	M	73	NR	3 days	3 days	158 days	Yes	Absent motor responses with reduced sensory amplitudes	Reactive 6-7 Hz background	Died of nosocomial infection at 158 days	IVIG
Ostabal Artigas (2014)[20]	F	46	NR	3 days	6 days	60 days	Yes	Axonal injury	Reactive alpha activity	Walking at 7 months	Plasma exchange
Hassan (1991)[21]	M	45	NR	3 days	3 days	180 days	NR	NR	Non-reactive alpha rhythm	Still wheelchair dependent at 14 months	NR
Joshi (2008) [22]	M	34	NR	4 h	24 h	84 days	NR	No sensory-motor responses	NR	Off ventilator at 12 weeks	NR
Joshi (2008) [22]	M	59	NR	10 days	11 days	112 days	NR	No sensory-motor responses	Normal	Off ventilator at 16 weeks	NR
Bohlega (1996)[23]	M	45	NR	1 day	3 days	300 days	Yes	No sensory-motor responses	NR	Severe quadriplegia persisted at 2.5 years	Plasma exchange + IVIG
Sarna (2024)[24]	F	49	0	1 day	3 days	NR	NR	Axonal injury	Diffuse encephalopathic changes	Independent walking at 80 days	IVIG
Stojkovic (2001)[25]	M	47	NR	Intubated after trauma	8 days	NR	NR	Demyelination with axonal injury	Non-reactive theta activity	Independent walking at 6 months	IVIG
Rougé (2016)[26]	M	47	60	3 h	3 days	300 days	NR	Demyelinating pattern	REM-sleep-like pattern	Walking with a cane at 2 years	Plasma exchange + IVIG
Tan CY (2018)[27]	M	65	30	3 days	8 days	82 days	Yes	Sensory-motor axonal neuropathy	Diffuse theta-delta, non-reactive	Walking with a cane at 15 months	IVIG
Tan IL (2010)[28]	M	44	NR	2 days	5 days	NR	Yes	No sensory-motor responses	NR	Marked limb weakness at 1 year	IVIG
Friedman (2003) case 1	F	57	NR	3 days	6 days	NR	NR	No sensory-motor responses	Diffuse theta activity	Upper limbs 2-3/5, lower limbs 3-4/5 at 64 weeks	NR
[29]
Friedman (2003) case 2	M	27	NR	Hours	5 days	240 days	NR	No sensory-motor responses	Low-voltage alpha activity	Upper limbs 3/5, lower limbs 1/5 at 70 weeks	IVIG
[29]
Ma (2010)[30]	M	52	36	2 days	5 days	30 days	Yes	Peripheral nerve injury	Low-amplitude slow waves	Gradual recovery of strength after 1 month	IVIG
